# Supplementary material for: CDC42 deficiency leads to endometrial stromal cell senescence in recurrent implantation failure
Source: PubMed Central journal article supplement (PMC11630066; doi:10.1093/humrep/deae246), 2024-11-01
Supplement: deae246_supplementary_figure_s1.pdf [file deae246_supplementary_figure_s1.pdf]

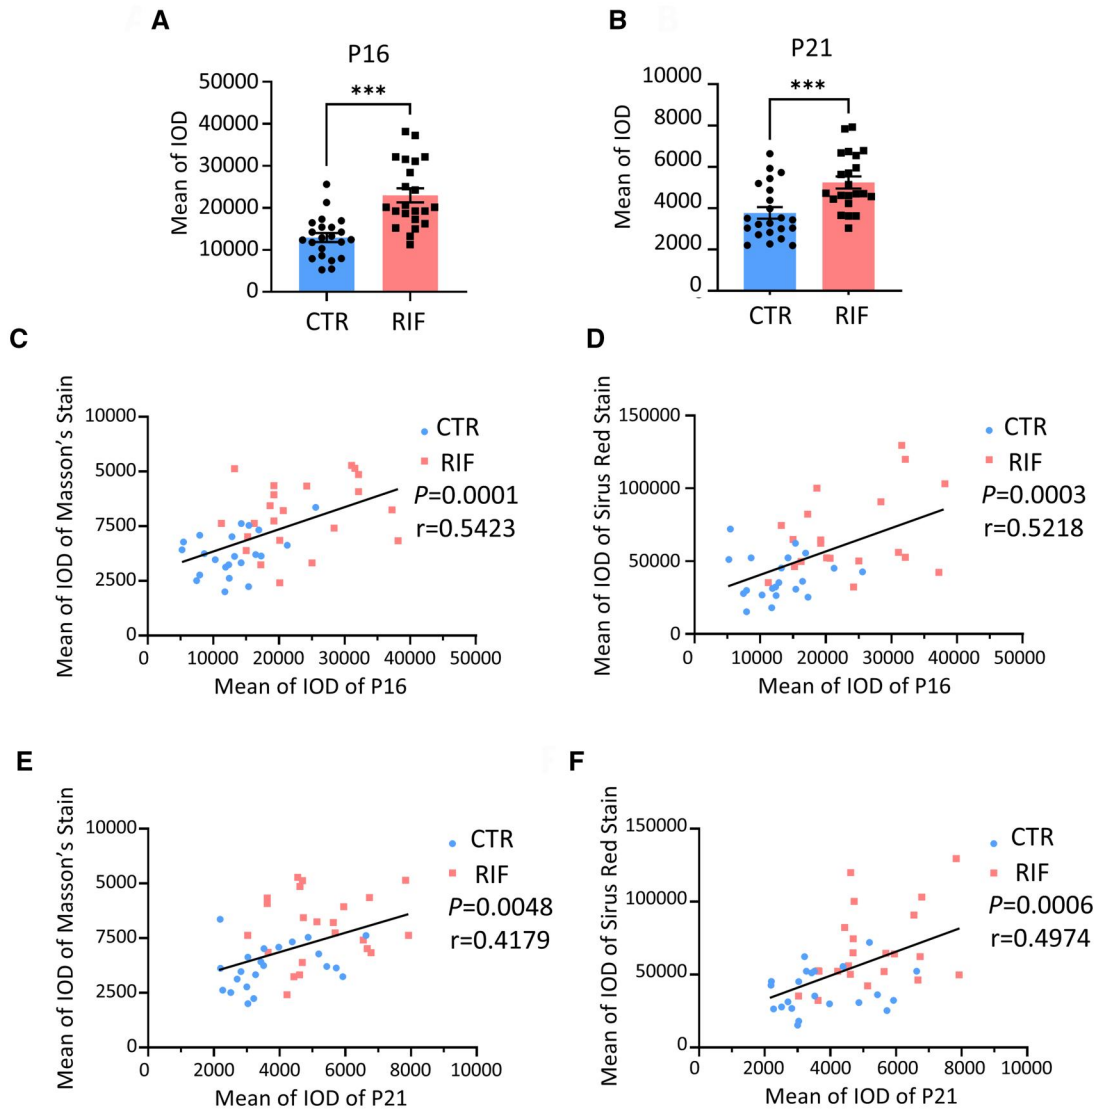

**Supplementary Figure S1. Endometrial fibrosis is associated with senescence.** (A) Quantitative analysis of integrated optical density (IOD) for immunohistochemical (IHC) staining of P16 in mid-secretory endometrium of CTR patients ( $n = 22$ ) versus recurrent implantation failure (RIF) patients ( $n = 22$ ). (B) Quantitative analysis of IOD for IHC staining of P21 in mid-secretory endometrium of CTR patients ( $n = 22$ ) versus RIF patients ( $n = 22$ ). (C) Linear regression analysis of the correlation between P16 and Masson's staining in [Supplementary Fig. S1A](#) and [Fig. 1L](#). (D) Linear regression analysis of the correlation between P16 and Sirius Red staining in [Supplementary Fig. S1A](#) and [Fig. 1N](#). (E) Linear regression analysis of the correlation between P21 and Masson's staining in [Supplementary Fig. S1B](#) and [Fig. 1L](#). (F) Linear regression analysis of the correlation between P21 and Sirius Red staining in [Supplementary Fig. S1B](#) and [Fig. 1N](#). Mean $\pm$ SEM. \*\*\* $P < 0.001$ . Student's *t*-test.
