# Supplementary material for: CDC42 deficiency leads to endometrial stromal cell senescence in recurrent implantation failure
Source: PubMed Central journal article supplement (PMC11630066; doi:10.1093/humrep/deae246), 2024-11-01
Supplement: deae246_supplementary_figure_s2.pdf [file deae246_supplementary_figure_s2.pdf]

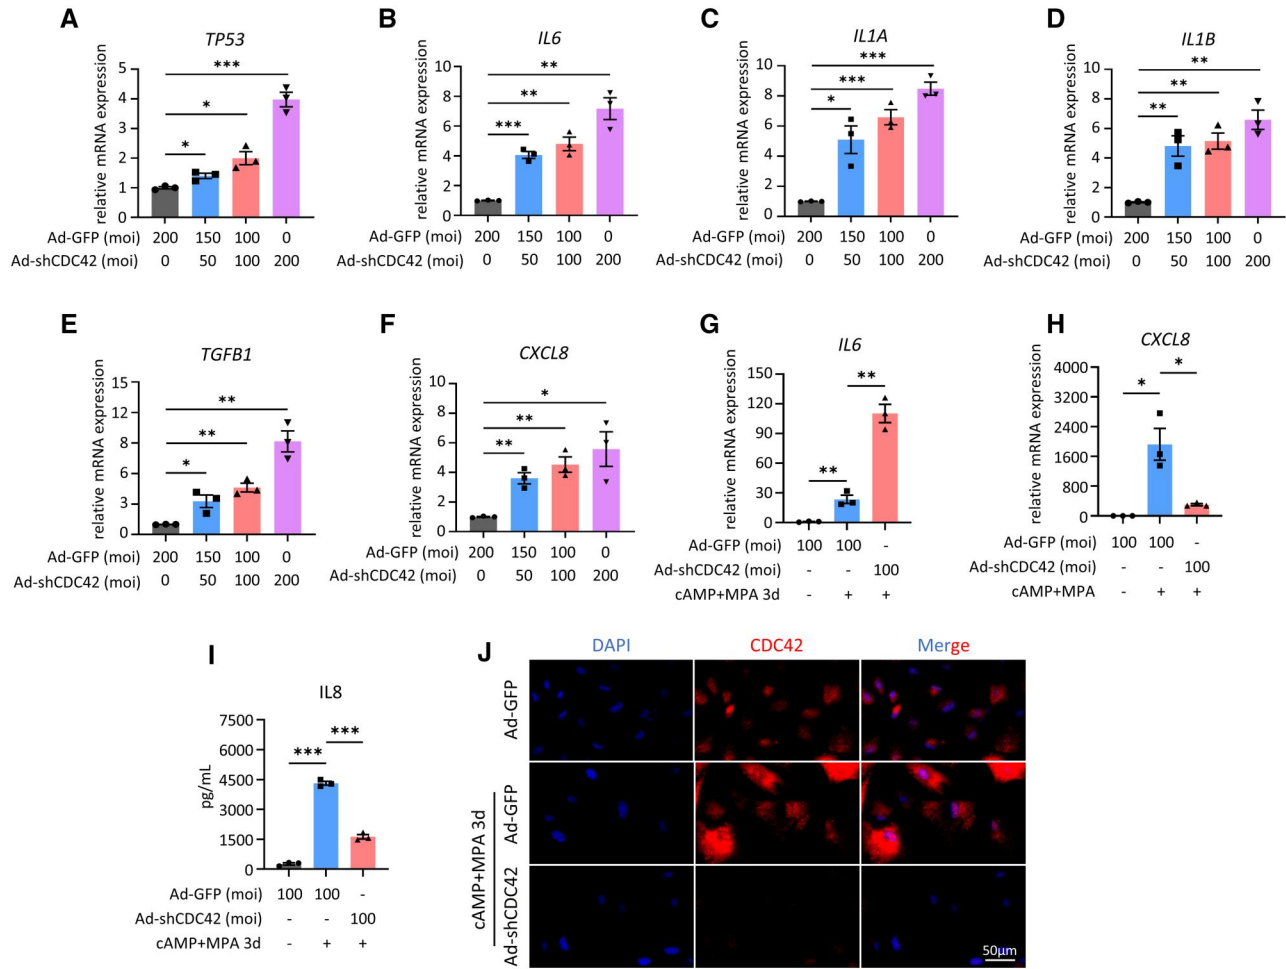

**Supplementary Figure S2. CDC42 knockdown promotes senescence in endometrial stromal cells (EnSCs).** (A–F) Expression of *TP53*, *IL6*, *IL1A*, *IL1B*, *TGFβ1*, and *CXCL8* mRNA levels in primary EnSCs after 72 h of adenovirus treatment. (G and H) Expression of *IL6* and *CXCL8* mRNA levels in primary EnSCs transfected with Ad-GFP or Ad-shCDC42-GFP following with 72 h of 8Br-cAMP+MPA treatment. (I) Level of *IL8* secretion in primary EnSCs transfected with Ad-GFP or Ad-shCDC42-GFP following with 72 h of 8Br-cAMP+MPA treatment. (J) Representative images of CDC42 immunofluorescence staining in primary EnSCs transfected with Ad-GFP or Ad-shCDC42-GFP following with 72 h of 8Br-cAMP+MPA treatment. Mean ± SEM. \* $P < 0.05$ , \*\* $P < 0.01$ , \*\*\* $P < 0.001$ . ANOVA with Tukey’s multiple comparisons test.
