# Supplementary material for: CDC42 deficiency leads to endometrial stromal cell senescence in recurrent implantation failure
Source: PubMed Central journal article supplement (PMC11630066; doi:10.1093/humrep/deae246), 2024-11-01
Supplement: deae246_supplementary_figure_s3.pdf [file deae246_supplementary_figure_s3.pdf]

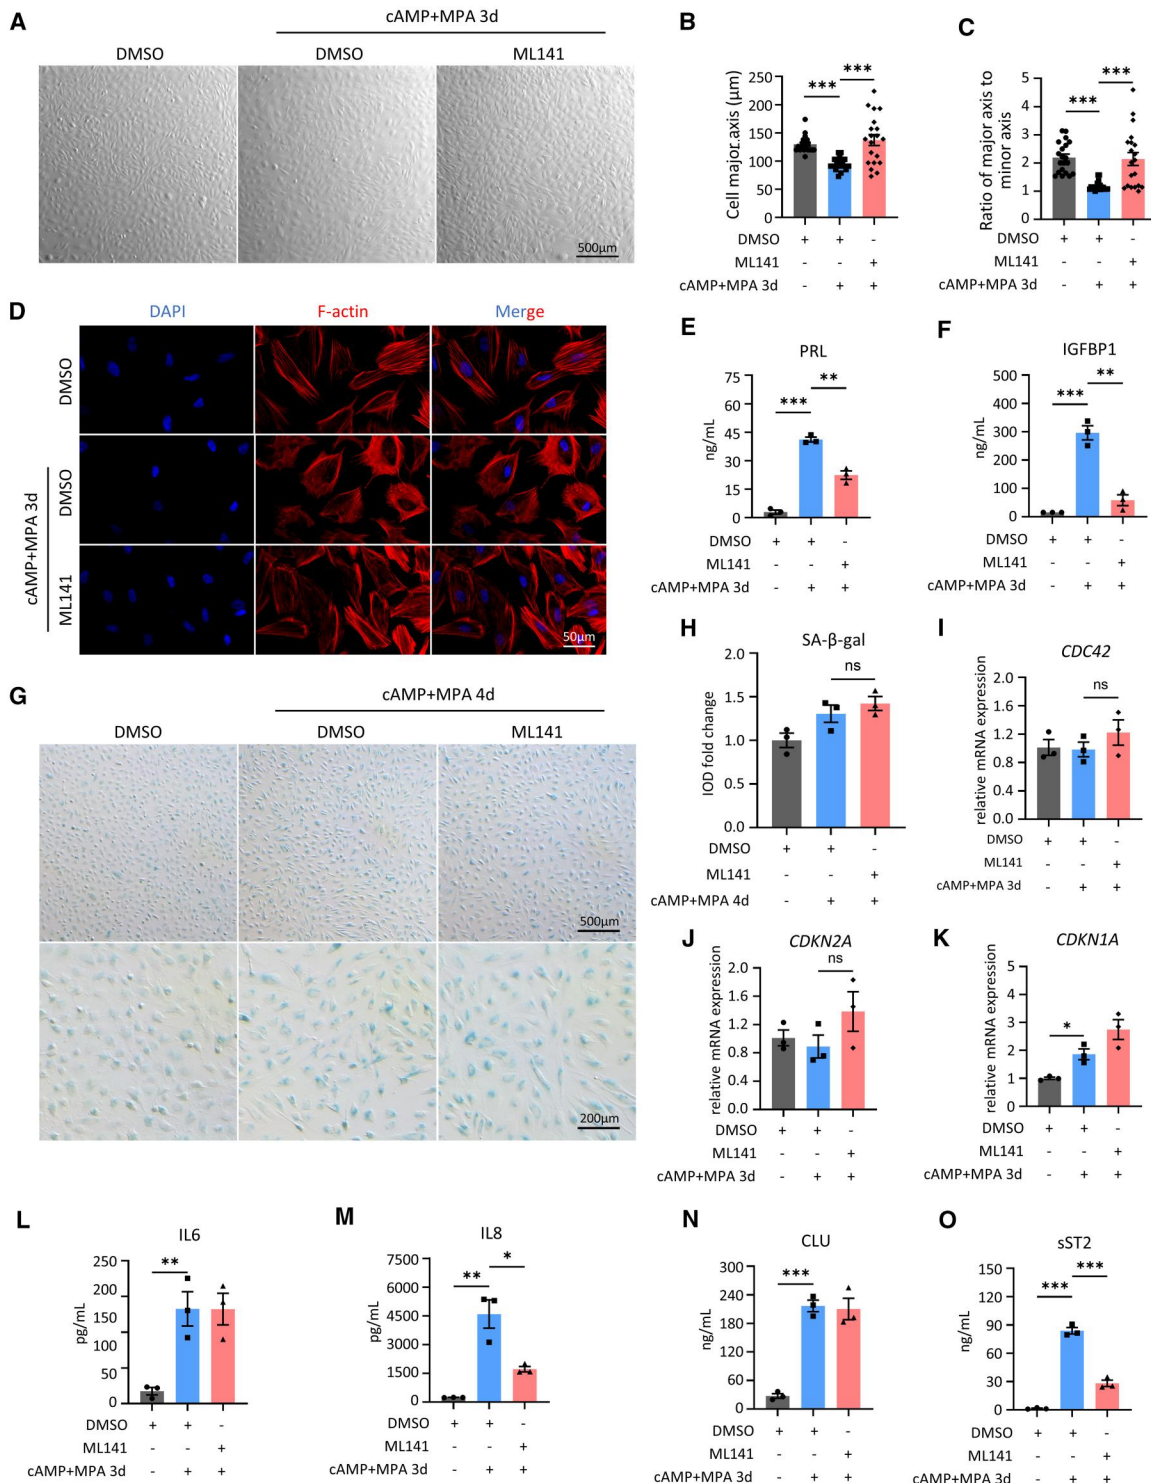

**Supplementary Figure S3. CDC42 enzymatic activity inhibition led to decidualization impairment without inducing cellular senescence. (A–C)** Representative bright field images of primary endometrial stromal cells (EnSCs) treated with DMSO or 10  $\mu$ M ML141 following with 72 h of 8Br-cAMP+MPA treatment. Quantitative analysis of cell major axis and the ratio of cell major axis to minor axis. **(D)** Representative images of F-actin immunofluorescence staining in primary EnSCs treated with DMSO or 10  $\mu$ M ML141 following with 72 h of 8Br-cAMP+MPA treatment, with continuous addition of inhibitors during decidualization. **(E and F)** Level of PRL and IGFBP1 secretion in primary EnSCs treated with DMSO or 10  $\mu$ M ML141 following with 72 h of 8Br-cAMP+MPA treatment, with continuous addition of inhibitors during decidualization. **(G and H)** SA- $\beta$ -gal staining of primary EnSCs treated with DMSO or 10  $\mu$ M ML141 following with 96 h of 8Br-cAMP+MPA treatment, with continuous addition of inhibitors during decidualization. Fold change of integrated optical density for SA- $\beta$ -gal staining. **(I–K)** Expression of CDC42, CDKN2A, and CDKN1A mRNA levels in primary EnSCs treated with DMSO or 10  $\mu$ M ML141 following with 96 h of 8Br-cAMP+MPA treatment, with continuous addition of inhibitors during decidualization. Decidualization induction medium supplemented with DMSO or ML141 was replaced every day. **(L–O)** Level of IL6, IL8, CLU, and sST2 secretion in primary EnSCs treated with DMSO or 10  $\mu$ M ML141 following with 72 h of 8Br-cAMP+MPA treatment, with continuous addition of inhibitors during decidualization. Mean  $\pm$  SEM. \* $P$ <0.05, \*\* $P$ <0.01, \*\*\* $P$ <0.001. ns, not significant. ANOVA with Tukey’s multiple comparisons test.
