# Supplementary material for: CDC42 deficiency leads to endometrial stromal cell senescence in recurrent implantation failure
Source: PubMed Central journal article supplement (PMC11630066; doi:10.1093/humrep/deae246), 2024-11-01
Supplement: deae246_supplementary_figure_s5.pdf [file deae246_supplementary_figure_s5.pdf]

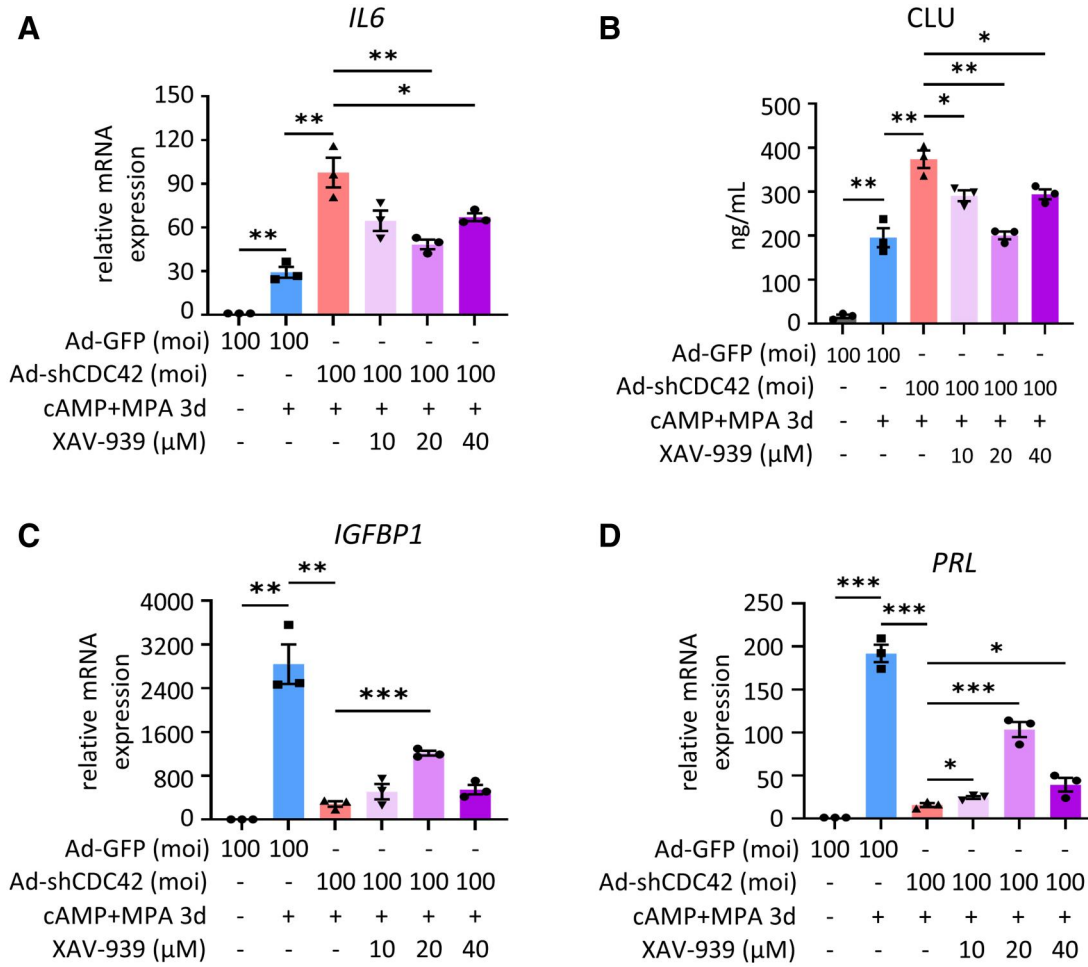

**Supplementary Figure S5. Blocking Wnt signaling partially rescues senescence and restores decidualization caused by CDC42 deficiency.** (A) Expression of *IL6* mRNA levels in immortalized endometrial stromal cells (T-EnSCs) transfected with Ad-GFP or Ad-shCDC42-GFP following with 72 h treatment of 8Br-cAMP+MPA with or without 10, 20, or 40 μM XAV-939. (B) Level of *CLU* secretion in T-EnSCs transfected with Ad-GFP or Ad-shCDC42-GFP following with 72 h treatment of 8Br-cAMP+MPA with or without 10, 20, or 40 μM XAV-939. (C and D) Expression of *PRL* and *IGFBP1* mRNA levels in T-EnSCs transfected with Ad-GFP or Ad-shCDC42-GFP following with 72 h treatment of 8Br-cAMP+MPA with or without 10, 20, or 40 μM XAV-939. Mean ± SEM. \*P<0.05, \*\*P<0.01, \*\*\*P<0.001. ANOVA with Tukey's multiple comparisons test.
