# Supplementary material for: CDC42 deficiency leads to endometrial stromal cell senescence in recurrent implantation failure
Source: PubMed Central journal article supplement (PMC11630066; doi:10.1093/humrep/deae246), 2024-11-01
Supplement: deae246_supplementary_table_s1.pdf [file deae246_supplementary_table_s1.pdf]

**Supplemental Table S1.** Clinical characteristics of women recruited in the study.

| Variables                      | CTR-proliferative (n = 12) | CTR-mid secretory (n = 59) | RIF-mid secretory (n = 37) | P-value   |
|--------------------------------|----------------------------|----------------------------|----------------------------|-----------|
| Age (years)                    | 29.50 ± 0.66               | 30.02 ± 0.41               | 30.11 ± 0.43               | 0.801     |
| BMI (kg/m <sup>2</sup> )       | 21.57 ± 0.66               | 22.98 ± 0.50               | 22.15 ± 0.53               | 0.306     |
| Basal FSH (mIU/ml)             | 7.08 ± 0.41                | 7.56 ± 0.28                | 7.17 ± 0.36                | 0.595     |
| Basal LH (mIU/ml)              | 4.65 ± 0.56                | 5.54 ± 0.39                | 4.41 ± 0.44                | 0.136     |
| Basal E <sub>2</sub> (pmol/ml) | 44.99 ± 5.85               | 39.63 ± 2.15               | 44.26 ± 4.32               | 0.495     |
| Infertility duration (years)   | 3.67 ± 0.67                | 3.00 ± 0.26                | 3.14 ± 0.27                | 0.534     |
| Number of embryos transferred  | 1.83 ± 0.21                | 1.64 ± 0.09                | 5.78 ± 0.29                | <0.001*** |

Values presented as mean±SEM. One-way ANOVA was employed to determine the difference among groups.

## For IHC assay

| Variables                     | CTR-proliferative (n = 6) | CTR-mid secretory (n = 28) | RIF-mid secretory (n = 22) | P-value   |
|-------------------------------|---------------------------|----------------------------|----------------------------|-----------|
| Age (years)                   | 29.83 ± 0.98              | 30.61 ± 0.57               | 30.86 ± 0.52               | 0.719     |
| BMI (kg/m <sup>2</sup> )      | 22.37 ± 0.99              | 23.60 ± 0.59               | 22.85 ± 0.76               | 0.594     |
| Basal FSH (mIU/ml)            | 6.75 ± 0.42               | 6.99 ± 0.31                | 7.52 ± 0.46                | 0.509     |
| Basal LH (mIU/ml)             | 4.41 ± 0.49               | 5.05 ± 0.39                | 4.67 ± 0.69                | 0.799     |
| Basal E <sub>2</sub> (pg/ml)  | 49.14 ± 10.22             | 36.95 ± 5.98               | 46.28 ± 6.85               | 0.487     |
| Infertility duration (years)  | 3.17 ± 0.83               | 3.38 ± 0.35                | 3.21 ± 0.39                | 0.936     |
| Number of embryos transferred | 1.67 ± 0.33               | 1.79 ± 0.13                | 6.09 ± 0.41                | <0.001*** |

Values presented as mean±SEM. One-way ANOVA was employed to determine the difference among groups.

## For WB/RT-qPCR assay

| Variables                     | CTR-proliferative (n = 6) | CTR-mid secretory (n = 18) | RIF-mid secretory (n = 12) | P-value   |
|-------------------------------|---------------------------|----------------------------|----------------------------|-----------|
| Age (years)                   | 29.17 ± 0.95              | 29.11 ± 0.75               | 28.83 ± 0.59               | 0.954     |
| BMI (kg/m <sup>2</sup> )      | 20.77 ± 0.84              | 21.17 ± 0.62               | 20.82 ± 0.73               | 0.909     |
| Basal FSH (mIU/ml)            | 7.42 ± 0.71               | 8.26 ± 0.57                | 6.98 ± 0.64                | 0.311     |
| Basal LH (mIU/ml)             | 4.89 ± 1.05               | 5.74 ± 0.75                | 4.07 ± 0.44                | 0.248     |
| Basal E <sub>2</sub> (pg/ml)  | 40.83 ± 6.24              | 47.46 ± 3.95               | 39.31 ± 2.72               | 0.293     |
| Infertility duration (years)  | 4.17 ± 1.08               | 2.94 ± 0.50                | 3.33 ± 0.39                | 0.439     |
| Number of embryos transferred | 2.00 ± 0.26               | 1.50 ± 0.15                | 5.33 ± 0.48                | <0.001*** |

Values presented as mean±SEM. One-way ANOVA was employed to determine the difference among groups.

## For primary EnSCs

| Variables                     | CTR-mid secretory (n = 13) | RIF-mid secretory (n = 3) | P-value   |
|-------------------------------|----------------------------|---------------------------|-----------|
| Age (years)                   | 30.08 ± 0.79               | 29.67 ± 2.60              | 0.841     |
| BMI (kg/m <sup>2</sup> )      | 22.18 ± 0.94               | 22.30 ± 0.46              | 0.952     |
| Basal FSH (mIU/ml)            | 7.42 ± 0.49                | 5.42 ± 0.83               | 0.093     |
| Basal LH (mIU/ml)             | 5.66 ± 0.94                | 3.87 ± 1.39               | 0.408     |
| Basal E <sub>2</sub> (pg/ml)  | 42.11 ± 4.87               | 49.99 ± 19.52             | 0.561     |
| Infertility duration (years)  | 2.39 ± 0.35                | 1.83 ± 0.44               | 0.486     |
| Number of embryos transferred | 1.62 ± 0.21                | 5.33 ± 0.33               | <0.001*** |

Values presented as mean±SEM. Student's t-test was employed to determine the difference between groups. RIF, recurrent implantation failure; IHC, immunohistochemical; EnSCs, endometrial stromal cells.
