# Supplementary material for: CDC42 deficiency leads to endometrial stromal cell senescence in recurrent implantation failure
Source: PubMed Central journal article supplement (PMC11630066; doi:10.1093/humrep/deae246), 2024-11-01
Supplement: deae246_supplementary_table_s2.pdf [file deae246_supplementary_table_s2.pdf]

Supplemental Table S2. Details of antibodies used.

| Antibody                                               | Application (dilution)                           | Source                    | Catalogue number |
|--------------------------------------------------------|--------------------------------------------------|---------------------------|------------------|
| CDC42                                                  | IHC (1:400), IF (1:200), WB (1:3000), IP (1:100) | Abcam                     | ab187643         |
| P16                                                    | IHC (1:400), IF (1:200)                          | proteintech               | 10883-1-AP       |
| P21                                                    | IHC (1:400), IF (1:200), WB (1:1000)             | proteintech               | 10355-1-AP       |
| P53                                                    | WB (1:1000)                                      | proteintech               | 10442-1-AP       |
| p- $\gamma$ H2AX                                       | WB (1:500)                                       | Abcam                     | ab22551          |
| F-actin (Phalloidin-iFluor 594)                        | IF (1:1000)                                      | Abcam                     | ab176757         |
| MitoSOX Red                                            | IF (0.25 $\mu$ g/ml)                             | Invitrogen                | M36008           |
| FOXO1                                                  | WB (1:1000)                                      | Cell Signaling Technology | 97635            |
| HOXA10                                                 | WB (1:500)                                       | proteintech               | 26497-1-AP       |
| Collagen I                                             | WB (1:1000)                                      | proteintech               | 14695-1-AP       |
| Collagen III                                           | WB (1:500)                                       | proteintech               | 22734-1-AP       |
| Collagen IV                                            | WB (1:500)                                       | Affinity                  | AF0510           |
| MMP2                                                   | WB (1:500)                                       | proteintech               | 10373-2-AP       |
| $\beta$ -catenin                                       | IF (1:100), WB (1:1000), IHC (1:400)             | Cell Signaling Technology | 9562             |
| p- $\beta$ -catenin(Ser33/37/Thr41)                    | WB (1:1000)                                      | Cell Signaling Technology | 9561             |
| GSK3 $\beta$                                           | WB (1:1000)                                      | Cell Signaling Technology | 9315             |
| p-GSK3 $\beta$ (S9)                                    | WB (1:1000)                                      | Cell Signaling Technology | 5558             |
| AKT                                                    | WB (1:1000), IP(1:100)                           | Cell Signaling Technology | 4691             |
| p-AKT (S473)                                           | WB (1:1000)                                      | Cell Signaling Technology | 9271             |
| GAPDH                                                  | WB (1:10000)                                     | Bioworld                  | AP0063           |
| HRP-conjugated Goat anti Rabbit secondary antibody     | WB (1:10000)                                     | ZSGB-BIO                  | ZB-2301          |
| HRP-conjugated Goat anti Mouse secondary antibody      | WB (1:10000)                                     | ZSGB-BIO                  | ZB-2305          |
| Donkey anti-Rabbit Secondary Antibody, Alexa Fluor 594 | IF (1:1000)                                      | Invitrogen                | A21207           |
| Goat anti-Rabbit Secondary Antibody, Alexa Fluor 488   | IF (1:1000)                                      | Invitrogen                | A11008           |
| Rabbit IgG (H + L)                                     | IP (1:500)                                       | BOSTER                    | BA1045           |
| anti-Flag-HRP                                          | WB (1:10000)                                     | Sigma                     | A8592            |
| Anti-HA Tag Antibody                                   | WB (1:1000)                                      | Abm                       | G036             |

IHC, immunohistochemical.
