# Supplementary material for: CDC42 deficiency leads to endometrial stromal cell senescence in recurrent implantation failure
Source: PubMed Central journal article supplement (PMC11630066; doi:10.1093/humrep/deae246), 2024-11-01
Supplement: deae246_supplementary_table_s3.pdf [file deae246_supplementary_table_s3.pdf]

Supplementary Table S3. Primers used for qRT-PCR (5'–3').

| Gene   | Forward primer           | Reverse primer           |
|--------|--------------------------|--------------------------|
| 18S    | CGGCTACCACATCCAAGGAA     | CTGGAATTACCGCGGCT        |
| CDC42  | CCCTCTACTATTGAGAACTTG    | AGAACACTCCACATACTTGA     |
| CDKN2A | GGGTTTTTCGTGGTTCACATCC   | CTAGACGCTGGCTCCTCAGTA    |
| CDKN1A | TGTCCGTCAGAACCCATGC      | AAAGTCGAAGTCCATCGCTC     |
| TP53   | CAGCACATGACGGAGGTTGT     | TCATCCAAATACTCCACACGC    |
| IL6    | ACTCACCTCTTCAGAACGAATTG  | CCATCTTTGGAAGGTTTCAGGTTG |
| CXCL8  | TTTTGCCAAGGAGTGCTAAAGA   | AACCCTCTGCACCCAGTTTTTC   |
| TGFB1  | TACCTGAACCCGTGTTGCTCTC   | GTTGCTGAGGTATCGCCAGGAA   |
| IL1A   | TGTATGTGACTGCCCAAGATGAAG | AGAGGAGGTTGGTCTCACTACC   |
| IL1B   | CCACAGACCTTCAGGAGAATG    | GTGCAGTTCAGTGATCGTACAGG  |
| PRL    | GGAGCAAGCCCAACAGATGAA    | GGCTCATTCCAGGATCGCAAT    |
| IGFBP1 | TTTTACCTGCCAAACTGCAACA   | CCCATTCCAAGGGTAGACGC     |
